# Supplementary material for: Comparative Photographic, Retrospective Analysis of Nonsyndromic Cleft Noses Treated with or without NAM
Source: PubMed Central journal article supplement — Plast Reconstr Surg Glob Open. 2020 Sep 23;8(9):e3045. doi: 10.1097/GOX.0000000000003045 (PMC7544263; doi:10.1097/gox.0000000000003045), 2020-09-23

CleftType: UCLP, Appearance: moderate

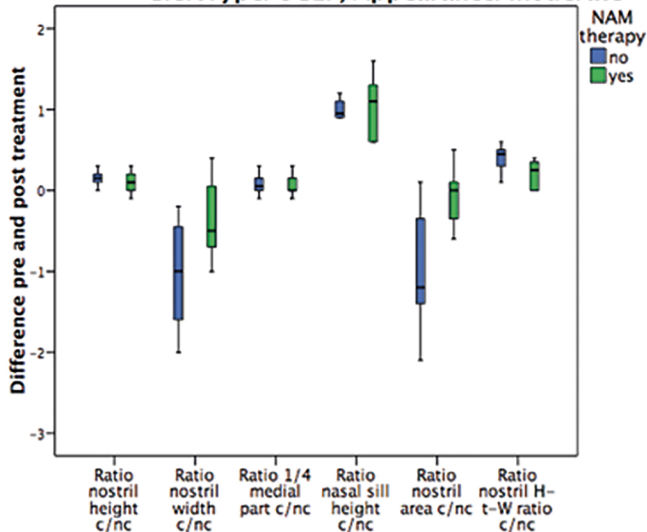

CleftType: UCLP, Appearance: severe

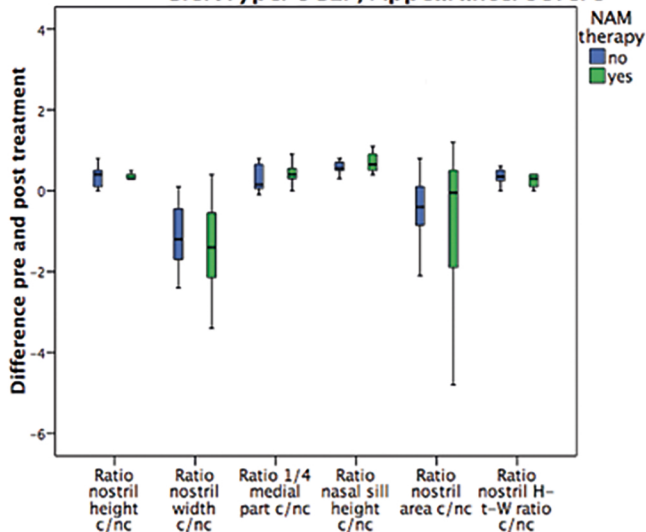

CleftType: BCLP, Appearance: moderate

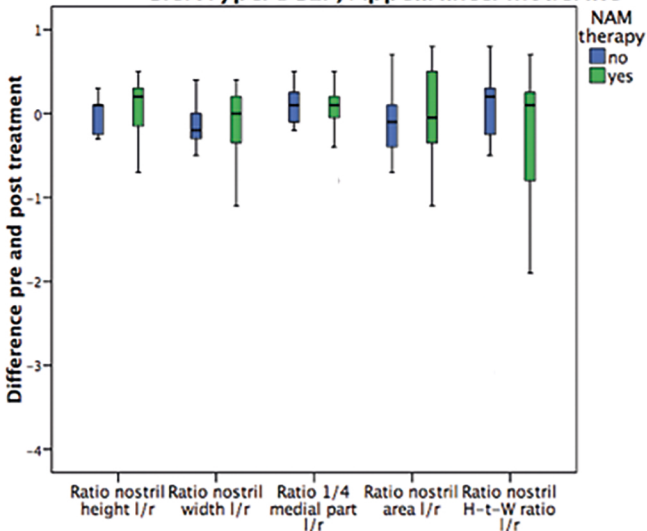

CleftType: BCLP, Appearance: severe

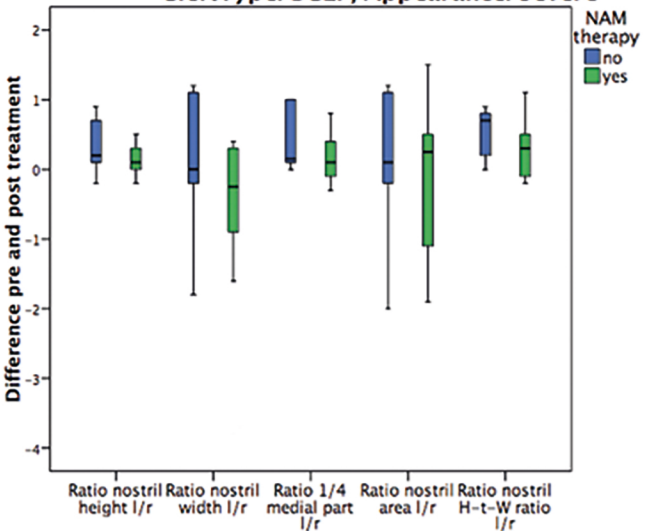

Supplement: gox-8-e3045-s001.pdf [file gox-8-e3045-s001.pdf]
